# Supplementary material
Source: PubMed Central journal article supplement (PMC2971694)
Supplement: NIHMS141872-supplement-1_si_001.pdf [file NIHMS141872-supplement-1_si_001.pdf]

# Supplementary Data

## Damage Recognition Models in Prokaryotic Nucleotide Excision Repair: Benzo[*a*]pyrene- Derived Lesions in UvrB

*Lei Jia<sup>‡</sup>, Konstantin Kropachev<sup>§</sup>, Shuang Ding<sup>‡</sup>, Bennett Van Houten<sup>¶</sup>, Nicholas E.  
Geacintov<sup>§</sup>, and Suse Broyde<sup>‡, §, \*</sup>*

<sup>‡</sup> Department of Biology and <sup>§</sup> Department of Chemistry, New York University, 100 Washington Square East, Room 1009, New York, New York 10003, <sup>¶</sup> Laboratory of Molecular Genetics, National Institute of Environmental Health Sciences, National Institutes of Health, 111 TW Alexander Drive, Research Triangle Park, North Carolina 27709

**Running title:** Damage recognition in UvrB

**Key words:** Nucleotide Excision Repair; UvrB; Flip Out; Translocation

\*To whom correspondence should be addressed: Suse Broyde: tel. (212)998-8231, fax (212)995-4015, e-mail [broyde@nyu.edu](mailto:broyde@nyu.edu)

## Molecular dynamics protocol

The system was reoriented with SIMULAID (1) to minimize the number of water molecules needed for solvation. The LEaP module of AMBER 8.0 was then employed to add counterions for neutralization and to solvate with a rectangular box of TIP3P water molecules (2). A buffer distance of 10 Å between each wall and the closest solute atom in each direction was employed. The number of counterions and water molecules added to the system and the sizes of the solvation boxes are given in Table S5.

All systems followed the same equilibration and MD treatment: (1) minimization of the counterions and solvent molecules (including crystallized waters) for 2000 steps of SD followed by 3000 steps of CG with 50 kcal/mol restraints on the solute atoms; (2) 30 ps initial MD at 10 K with 25 kcal/mol restraints on solute molecules allowing the solvent to relax; (3) 80 ps constant volume MD simulation to heat the system up from 10 K to 328 K followed by 20 ps constant volume MD at 328 K with 10.0 kcal/mol restraints on solute molecules; (4) 30 ps, 40 ps, and 50 ps MD with decreasing restraints of 10.0, 1.0, and 0.1 kcal/mol, respectively, on solute molecules; (5) 5 ns MD production at 328 K under constant pressure of 1 atm. Temperature and pressure coupling constants were both 1 ps.

We implemented all production MD simulations at 328K since our models are primarily based on the *Bca* UvrB thermophilic enzyme; experimental data with this enzyme was obtained at its physiologically relevant temperature in the present work and that of Jiang *et al.* (3). A 9 Å cutoff was applied to the non-bonded Lennard-Jones interactions. Long-range electrostatic interactions were treated with the Particle Mesh Ewald (PME) method (4,5). The SHAKE algorithm (6) was applied to constrain all bonds involving hydrogen atoms with relative geometrical tolerance of  $10^{-5}$  Å. A 2 fs time step was used, and the

translational/rotational center-of-mass motion was removed every 1 ps (7).

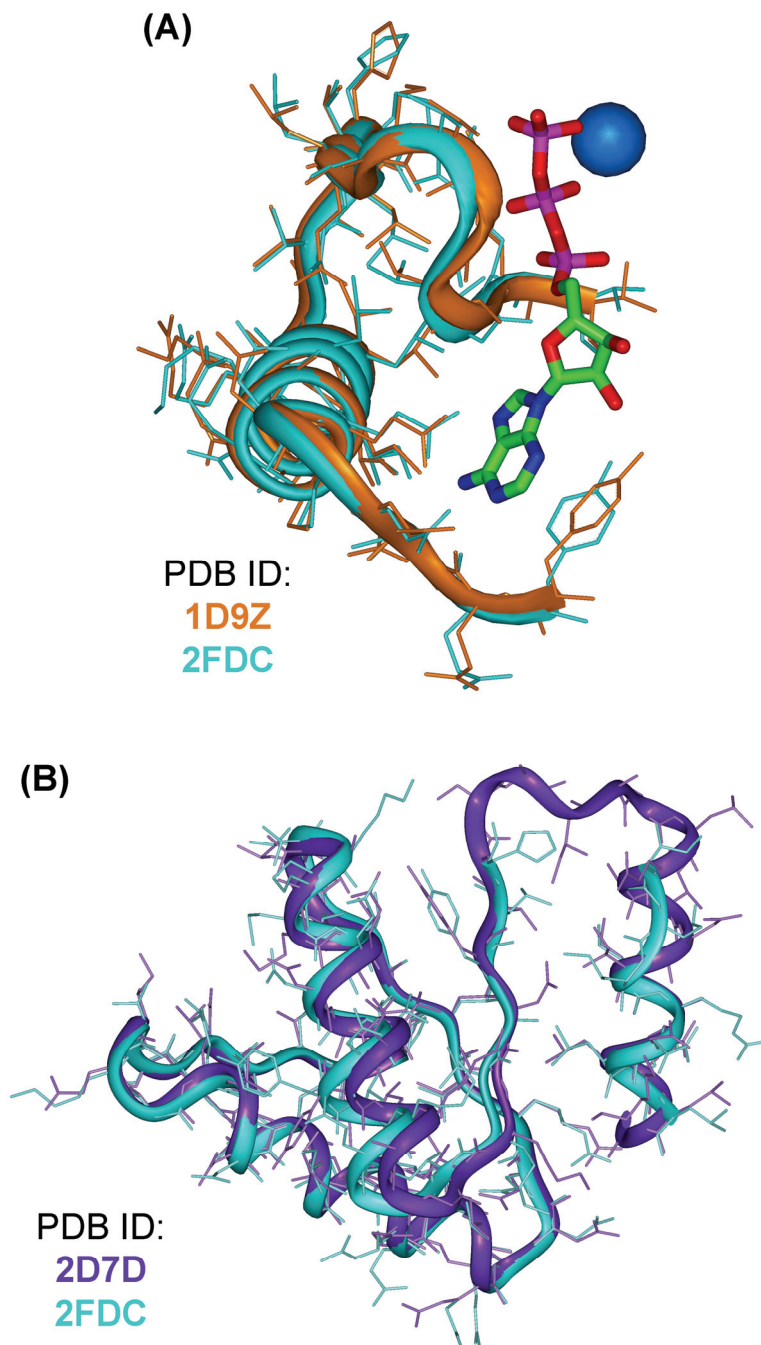

Figure S1: (A) The superimposition of the ATP binding site when modeling the ATP from 1D9Z into 2FDC. The ATP is shown in stick model colored by atom. The  $Mg^{2+}$  is shown in sphere. (B) The superimposition of protein residues 420-460 of 2FDC to residues 418-458 of 2D7D to model a missing loop from 2D7D to 2FDC. Protein is shown in cartoon with side chains shown in stick. The color code is shown in the figure.

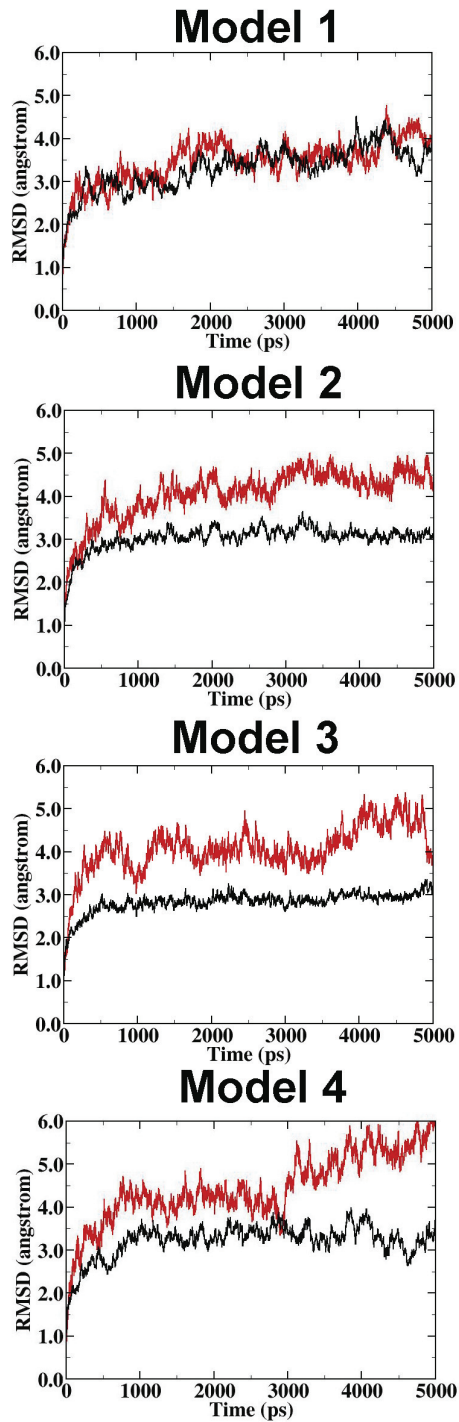

Figure S2: Plots of the all-atom root-mean-square deviations (RMSD) of the current relative to the starting structure as a function of time for the whole UvrB/DNA complex (black) and the damaged DNA (red). The damaged DNA is generally more flexible than the complex.

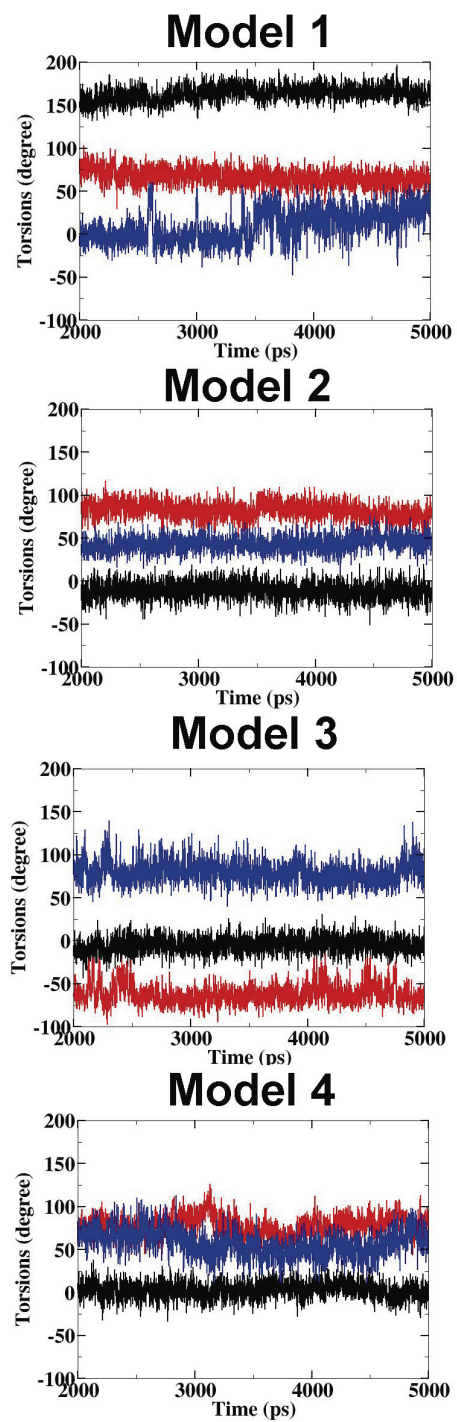

Figure S3: Plots of the torsion angles  $\chi$  (blue),  $\alpha'$  (black), and  $\beta'$  (red) for all complex models in the selected time frames for analysis

**Model 1 (pocket)**

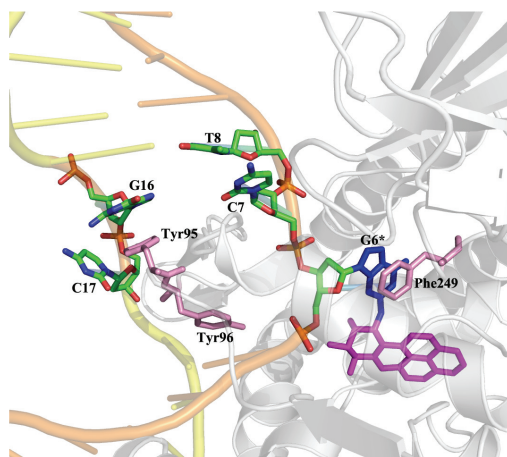

**Model 2 (tunnel)**

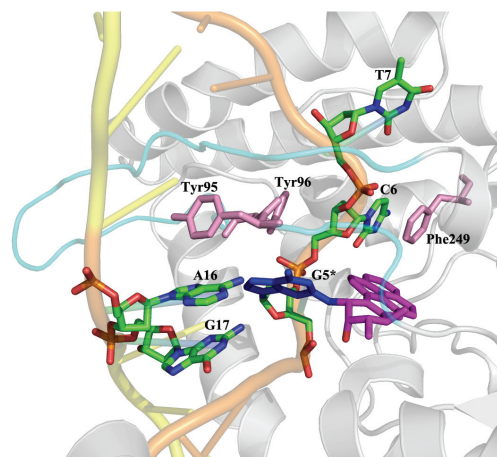

**Model 3 (gate)**

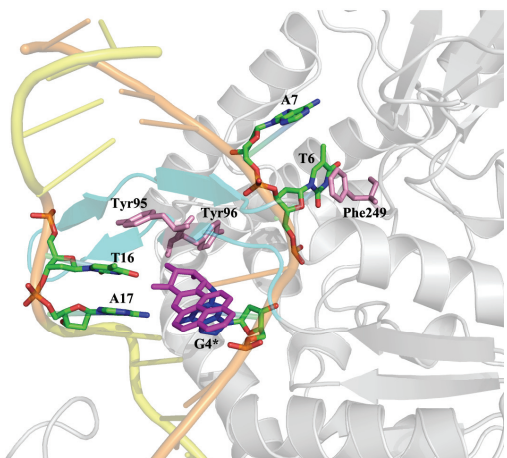

**Model 4 (outer strand)**

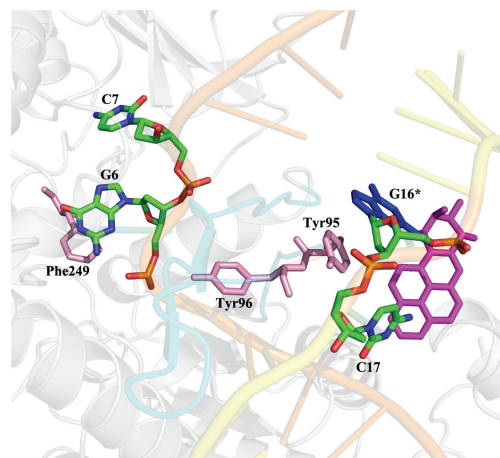

Figure S4: Flipping and stacking properties of the bases in representative structures of each model. UvrB is in cartoon and is semi-transparent.  $\beta$ -hairpin is shown in cyan. The G\* is blue and B[a]P is magenta. The DNA inner strand is shown in orange and the outer strand in yellow. The bases 6, 7, 16 and 17 are shown in stick with color-coding by atom. The amino acid residues Phe249, Tyr95 and Tyr96 are shown in pink. Hydrogen atoms are deleted for clarity.

### Flipped Out

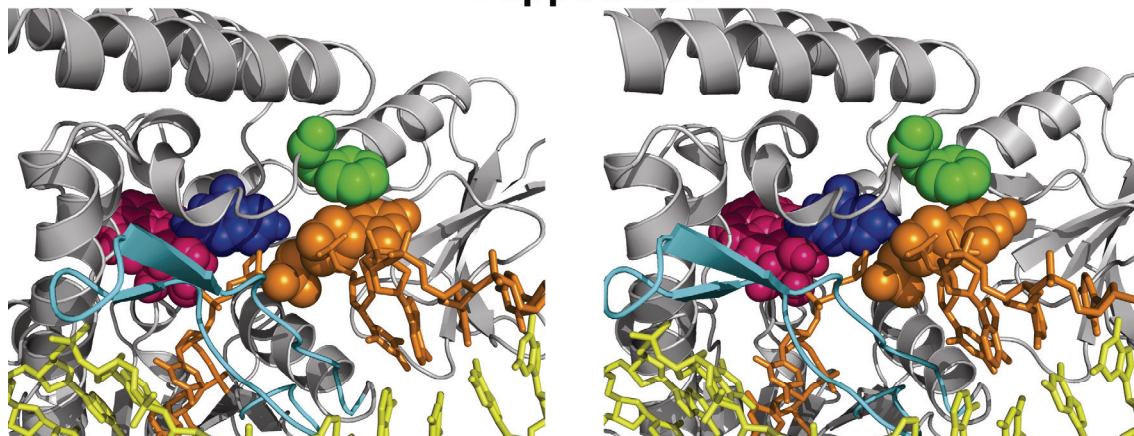

### Flipped In

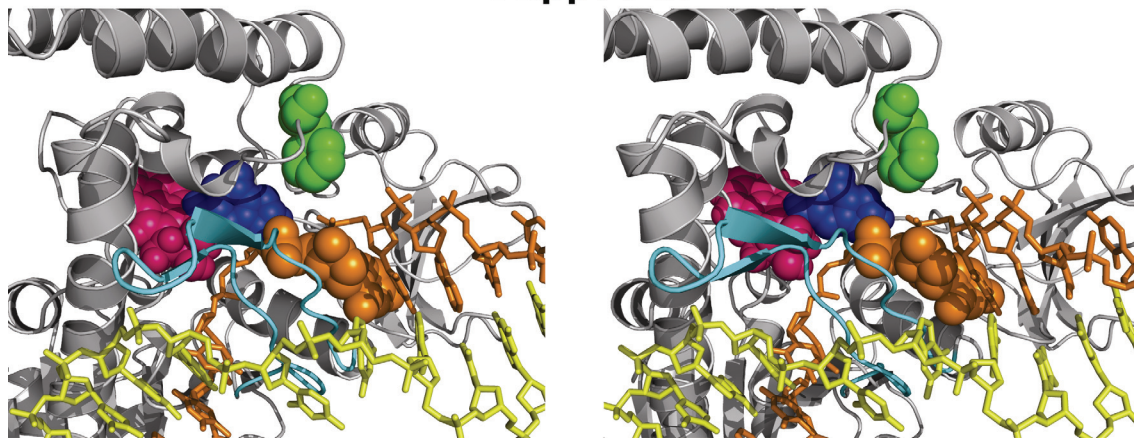

Figure S5, stereo views: The C7 base in the flipped-out and flipped-in positions of Model 1. Frames selected for illustration are at 128 ps, and 5000 ps, respectively. The C7, Phe302, and G6\* are in CPK renderings. C7 is colored in orange, Phe302 is colored in green, G6\* is colored in blue, and the adduct is colored in magenta. The C7 base is flipped-out in the early stage of the simulation and rotates to a flipped-in position after 1 ns of the simulation, where it remains for the duration of the simulation.



**Model 1 (In the pocket)**

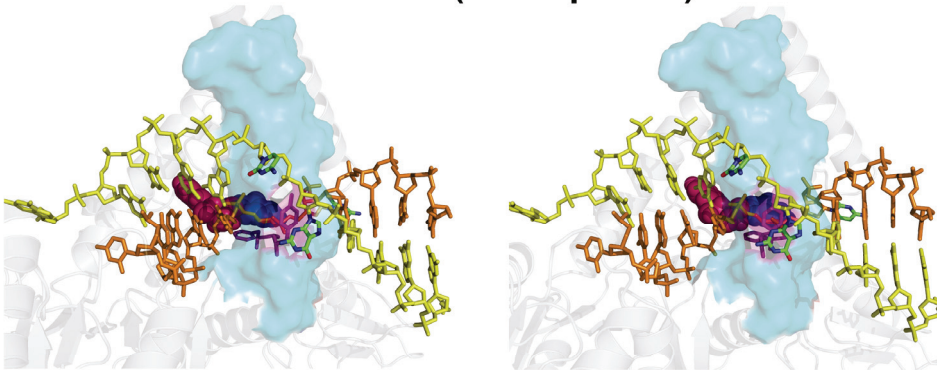

**Model 2 (In the tunnel)**

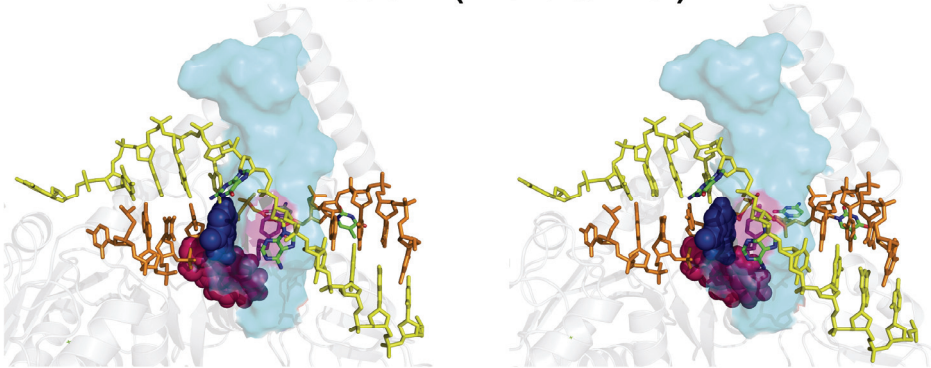

**Model 3 (At the gate)**

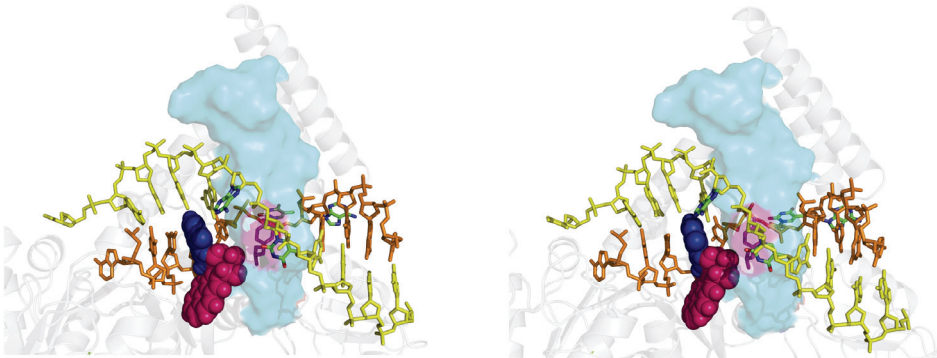

**Model 4 (On the outer strand)**

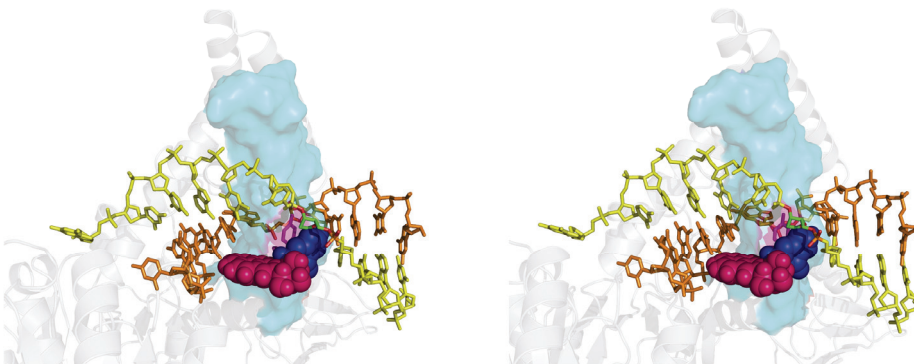

Figure S6: Stereo view of Figure 2.

**A**

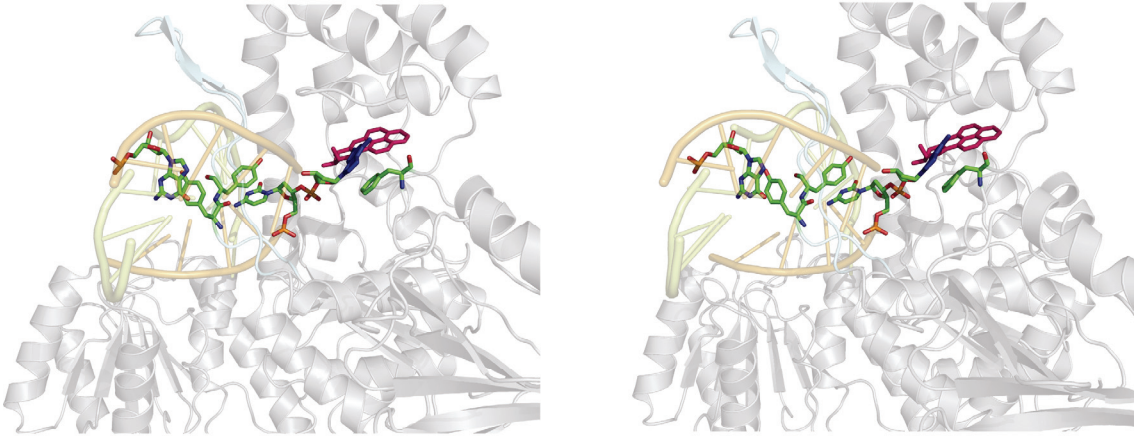

**B**

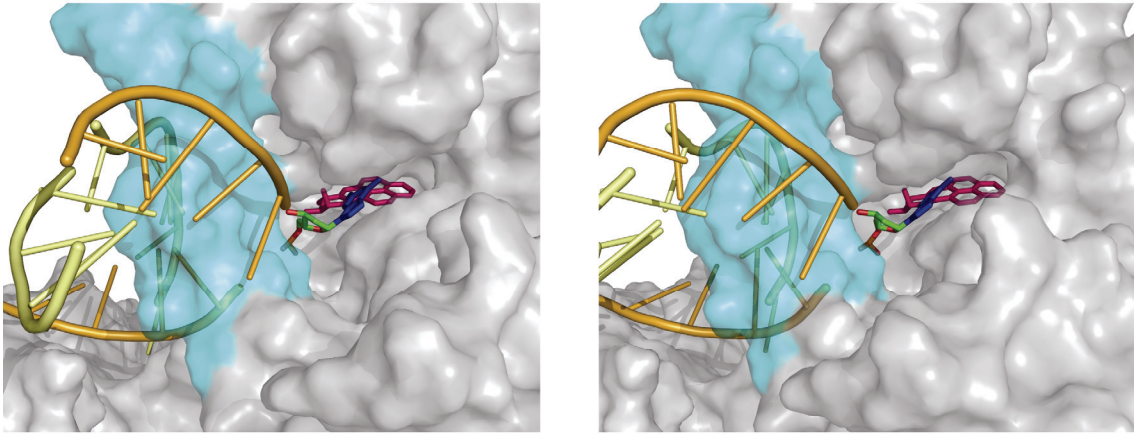

Figure S7: Stereo view of Figure 3.

## At the Gate

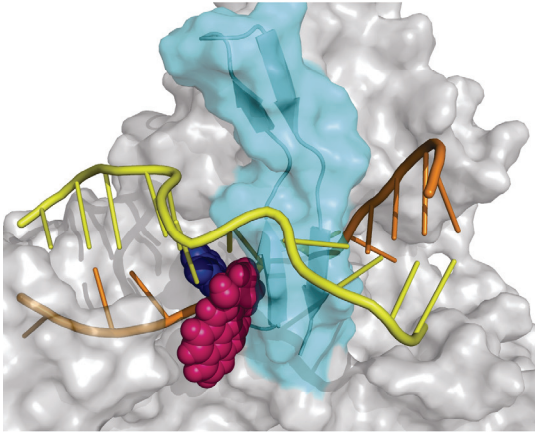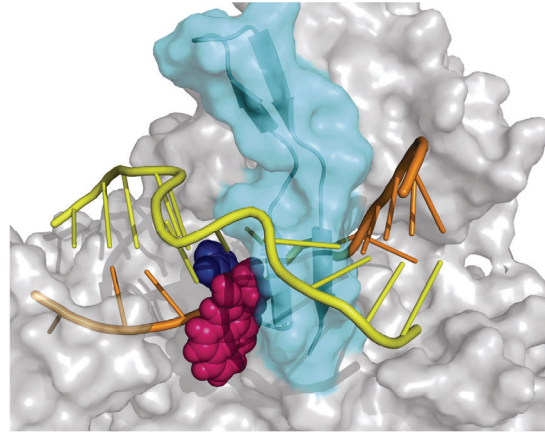

## In the Tunnel

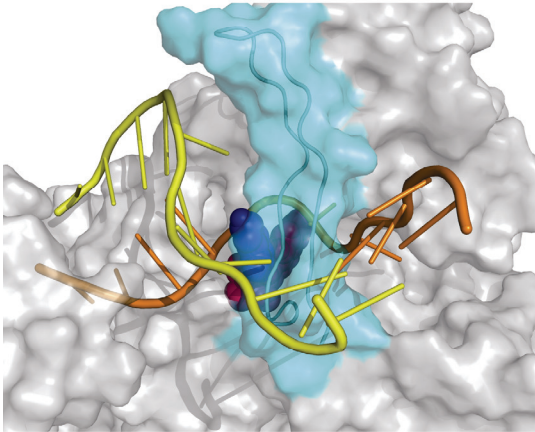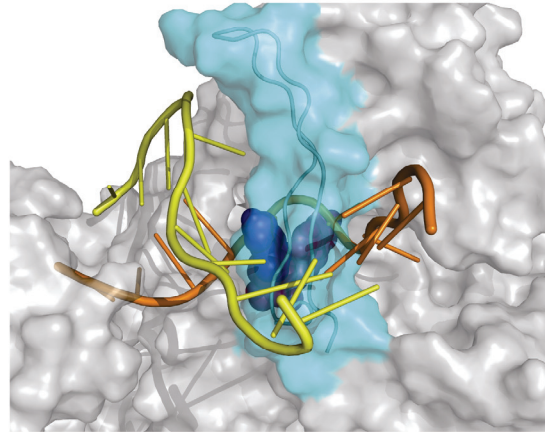

## In the Pocket

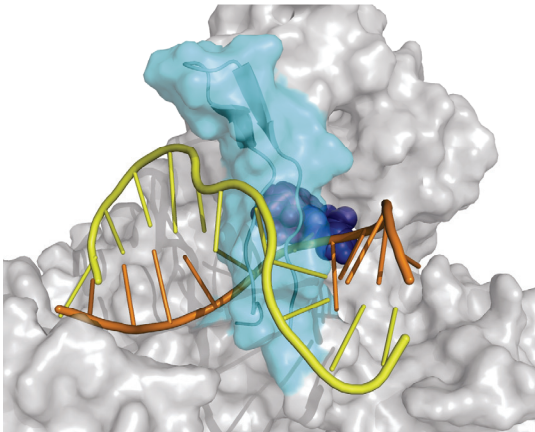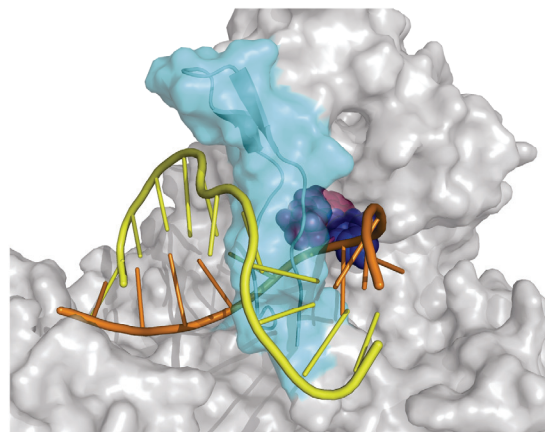

Figure S8: Stereo view of Figure 4.

## At the Gate

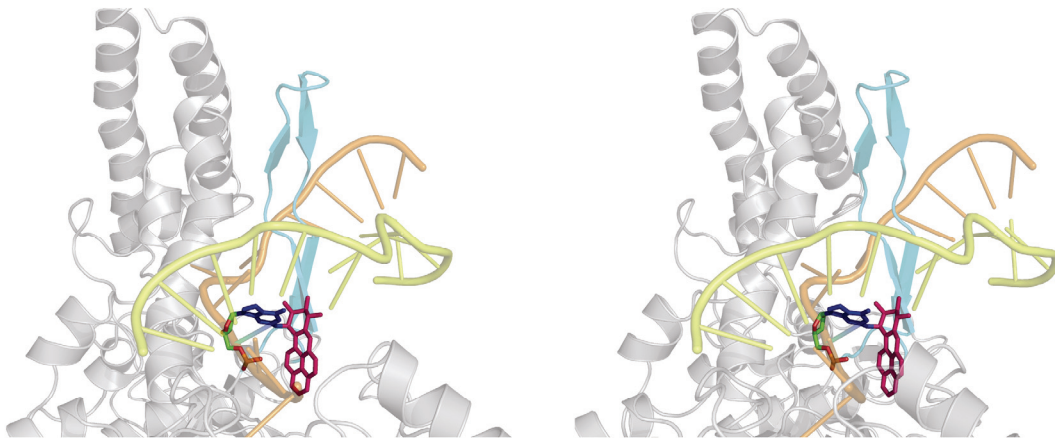

## In the Tunnel

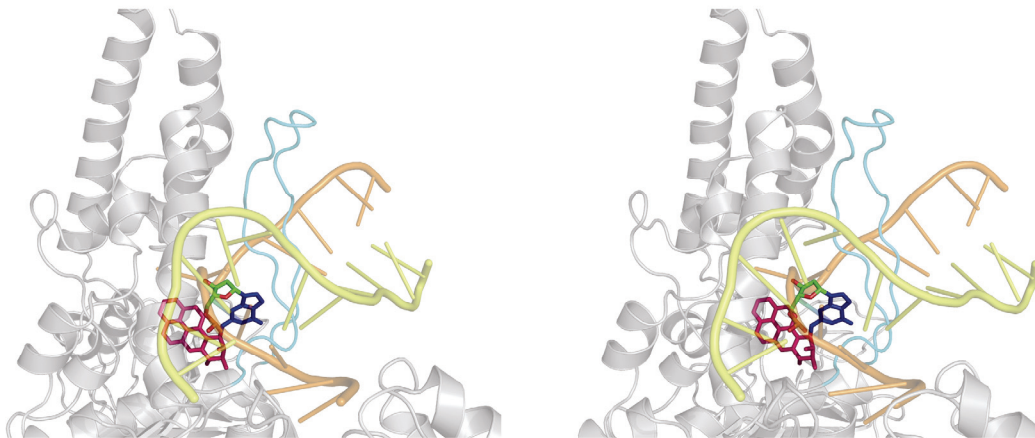

## In the Pocket

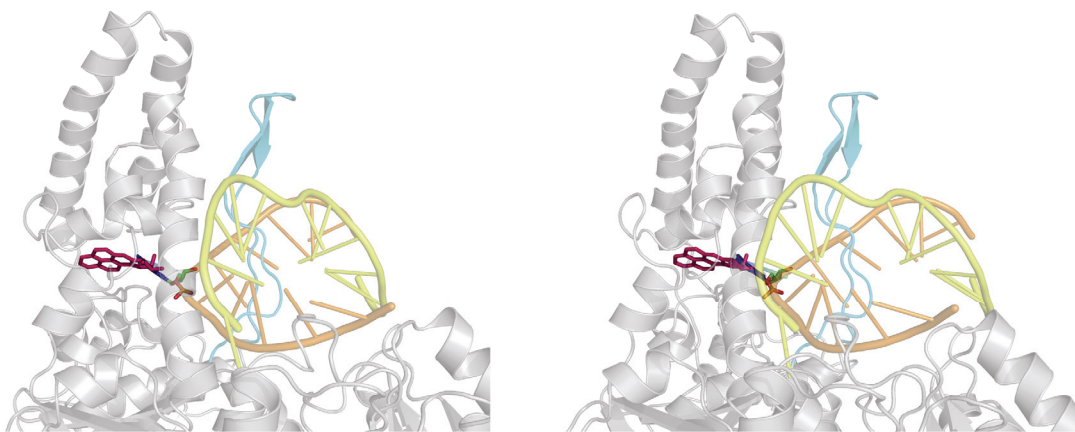

Figure S9: Stereo view Figure 4.

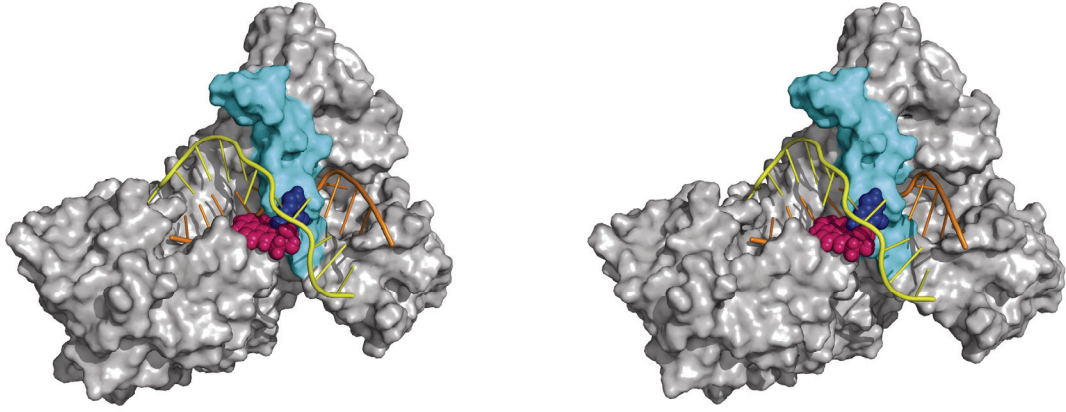

Figure S10: Stereo view Figure 5.

**Table S1:** Glycosidic torsion  $\chi$  values in initial models for MD simulations

|                | $\chi$ | $\alpha'$ | $\beta'$ |
|----------------|--------|-----------|----------|
| <b>Model 1</b> | -33°   | 169°      | 39°      |
| <b>Model 2</b> | 78°    | 63°       | -29°     |
| <b>Model 3</b> | 61°    | -64°      | 26°      |
| <b>Model 4</b> | 126°   | 40°       | 70°      |

**Table S2:** AMBER atom type, connection type, and partial charge assignments for the B[a]P adduct.

| Atom name | Atom type | Connection type | Partial charge |
|-----------|-----------|-----------------|----------------|
| P         | P         | M               | 1.218646       |
| O1P       | O2        | E               | -0.79319       |
| O2P       | O2        | E               | -0.79319       |
| O5'       | OS        | M               | -0.47064       |
| C5'       | CT        | M               | 0.073767       |
| H5'1      | H1        | E               | 0.019769       |
| H5'2      | H1        | E               | 0.019769       |
| C4'       | CT        | M               | 0.389993       |
| H4'       | H1        | E               | 0.031951       |
| O4'       | OS        | E               | -0.30042       |
| C3'       | CT        | M               | -0.00134       |
| H3'       | H1        | E               | 0.067506       |
| C2'       | CT        | 3               | -0.00304       |
| H2'1      | HC        | E               | 0.035953       |
| H2'2      | HC        | E               | 0.035953       |
| C1'       | CT        | B               | 0.096204       |
| H1'       | H2        | E               | 0.07063        |
| N9        | N*        | S               | 0.019725       |
| C8        | CK        | B               | 0.024448       |
| H8        | H5        | E               | 0.164855       |
| N7        | NB        | S               | -0.51017       |
| C5        | CB        | S               | 0.183596       |
| C6        | C         | B               | 0.416035       |
| O6        | O         | E               | -0.56242       |
| N1        | NA        | B               | -0.21083       |
| H1        | H         | E               | 0.249318       |
| C2        | CA        | B               | 0.086826       |
| N3        | NC        | S               | -0.33405       |
| C4        | CB        | E               | 0.182261       |
| N2        | N2        | B               | -0.04021       |
| H2        | H         | E               | 0.203357       |
| C10       | CT        | B               | -0.00353       |
| HC10      | H1        | E               | 0.125433       |
| CC9       | CT        | 3               | -0.02971       |
| HC9       | H1        | E               | 0.118181       |
| O9        | OH        | S               | -0.5722        |
| HO9       | HO        | E               | 0.337214       |
| CC8       | CT        | 3               | 0.331514       |
| HC8       | H1        | E               | 0.086002       |

| <b>Atom name</b> | <b>Atom type</b> | <b>Connection type</b> | <b>Partial charge</b> |
|------------------|------------------|------------------------|-----------------------|
| O8               | OH               | S                      | -0.68321              |
| HO8              | HO               | E                      | 0.417026              |
| CC7              | CT               | 3                      | 0.083526              |
| HC7              | H1               | E                      | 0.071384              |
| O7               | OH               | S                      | -0.62942              |
| HO7              | HO               | E                      | 0.407107              |
| C6A              | CA               | S                      | -0.00111              |
| CC6              | CA               | B                      | -0.1538               |
| HC6              | HA               | E                      | 0.174033              |
| C5A              | CA               | B                      | 0.001065              |
| C17              | CA               | E                      | 0.007701              |
| CC5              | CA               | B                      | -0.14937              |
| HC5              | HA               | E                      | 0.145695              |
| CC4              | CA               | B                      | -0.20343              |
| HC4              | HA               | E                      | 0.156203              |
| C3A              | CA               | B                      | 0.071641              |
| C16              | CA               | E                      | 0.095343              |
| CC3              | CA               | B                      | -0.19416              |
| HC3              | HA               | E                      | 0.166654              |
| CC2              | CA               | B                      | -0.18043              |
| HC2              | HA               | E                      | 0.167265              |
| CC1              | CA               | B                      | -0.15982              |
| HC1              | HA               | E                      | 0.155534              |
| C15              | CA               | S                      | 0.009637              |
| C12              | CA               | B                      | -0.18392              |
| HC12             | HA               | E                      | 0.164501              |
| C11              | CA               | B                      | -0.09819              |
| HC11             | HA               | E                      | 0.047767              |
| C14              | CA               | S                      | -0.00277              |
| C13              | CA               | E                      | -0.13559              |
| O3'              | OS               | M                      | -0.53085              |



**Table S3:** AMBER atom type, connection type, and partial charge assignments for ATP

| <b>Atom name</b> | <b>Atom type</b> | <b>Connection type</b> | <b>Partial charge</b> |
|------------------|------------------|------------------------|-----------------------|
| O1G              | O2               | M                      | -0.98988              |
| PG               | P                | M                      | 1.361617              |
| O2G              | O2               | E                      | -0.98988              |
| O3G              | O2               | E                      | -0.98988              |
| O3B              | OS               | M                      | -0.68922              |
| PB               | P                | M                      | 1.285387              |
| O1B              | O2               | E                      | -0.78907              |
| O2B              | O2               | E                      | -0.78907              |
| O3A              | OS               | M                      | -0.44729              |
| PA               | P                | M                      | 0.895664              |
| O1A              | O2               | E                      | -0.75085              |
| O2A              | O2               | E                      | -0.75085              |
| O5'              | OS               | M                      | -0.44344              |
| C5'              | CT               | M                      | -0.01252              |
| H5'1             | H1               | E                      | 0.114044              |
| H5'2             | H1               | E                      | 0.114044              |
| C4'              | CT               | M                      | 0.082282              |
| H4'              | H1               | E                      | 0.012335              |
| O4'              | OS               | E                      | -0.3307               |
| C3'              | CT               | M                      | 0.552523              |
| H3'              | H1               | E                      | 0.03123               |
| O3'              | OH               | S                      | -0.71927              |
| H3T              | HO               | E                      | 0.379231              |
| C2'              | CT               | M                      | 0.042298              |
| H2'              | H1               | E                      | 0.115413              |
| O2'              | OH               | S                      | -0.64696              |
| H2T              | HO               | E                      | 0.34967               |
| C1'              | CT               | M                      | -0.0099               |
| H1'              | H2               | E                      | 0.110974              |
| N9               | N*               | M                      | 0.06168               |
| C8               | CK               | M                      | 0.113645              |
| H8               | H5               | E                      | 0.215497              |
| N7               | NB               | M                      | -0.56702              |
| C5               | CB               | M                      | 0.033375              |
| C4               | CB               | M                      | 0.370085              |
| N3               | NC               | M                      | -0.70756              |
| C2               | CQ               | M                      | 0.552357              |
| H2               | H5               | E                      | 0.037524              |
| N1               | NC               | M                      | -0.84816              |
| C6               | CA               | M                      | 0.761045              |
| N6               | N2               | B                      | -0.92335              |
| H61              | H                | E                      | 0.401472              |
| H62              | H                | E                      | 0.401472              |

**Table S4:** AMBER atom type, connection type, and partial charge assignments for Mg<sup>2+</sup>

| <b>Atom<br/>name</b> | <b>Atom<br/>type</b> | <b>Connection<br/>type</b> | <b>Partial<br/>charge</b> |
|----------------------|----------------------|----------------------------|---------------------------|
| MG                   | MG                   | M                          | 2.000                     |

**Table S5:** Box sizes and numbers of waters and counterions in MD simulation initial models

---

|                |                                                                |
|----------------|----------------------------------------------------------------|
| <b>Model 1</b> | 112Å x 77Å x 96Å<br>18789 H <sub>2</sub> O, 38 Na <sup>+</sup> |
| <b>Model 2</b> | 112Å x 79Å x 96Å<br>19441 H <sub>2</sub> O, 38 Na <sup>+</sup> |
| <b>Model 3</b> | 112Å x 79Å x 96Å<br>19446 H <sub>2</sub> O, 38 Na <sup>+</sup> |
| <b>Model 4</b> | 112Å x 77Å x 96Å<br>19091 H <sub>2</sub> O, 38 Na <sup>+</sup> |

---

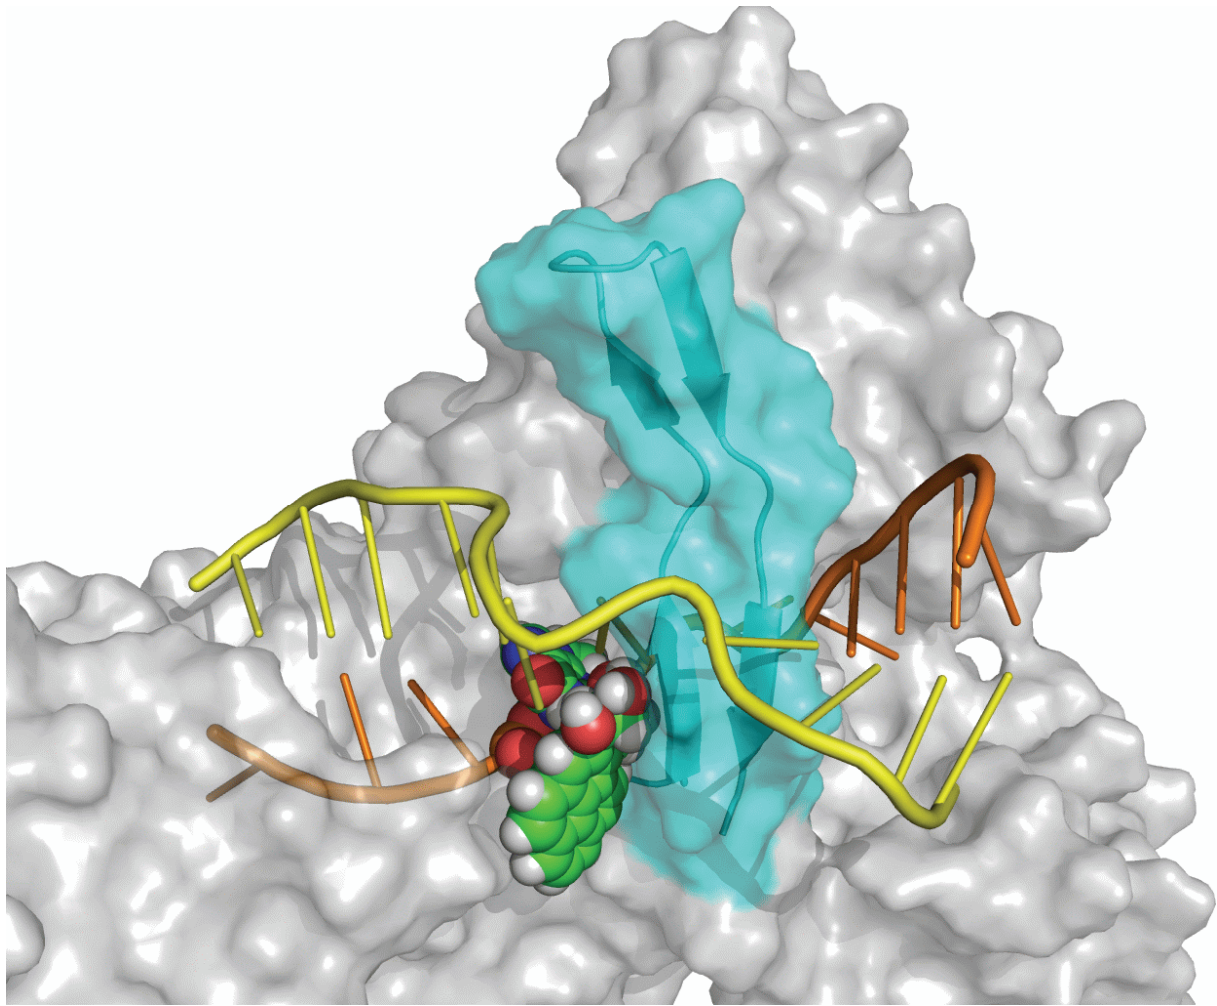

Translocation movie: The B[a]P lesion is in CPK colored by atom. The  $\beta$ -hairpin of UvrB is in cyan.

## References

1. Mezei, M. (1997) Optimal position of solute for simulations. *Journal of Computational Chemistry*, **18**, 812-815.
2. Jorgensen, W.L., Chandrasekhar, J., Madura, J.D., Impey, R.W. and Klein, M.L. (1983) Comparison of Simple Potential Functions for Simulating Liquid Water. *J Chem Phys*, **79**, 926-935.
3. Jiang, G.H., Skorvaga, M., Croteau, D.L., Van Houten, B. and States, J.C. (2006) Robust incision of Benzo[a]pyrene-7,8-dihydrodiol-9,10-epoxide-DNA adducts by a recombinant thermoresistant interspecies combination UvrABC endonuclease system. *Biochemistry*, **45**, 7834-7843.
4. Darden, T., York, D. and Pedersen, L. (1993) Particle Mesh Ewald - an N.Log(N) Method for Ewald Sums in Large Systems. *J Chem Phys*, **98**, 10089-10092.
5. Essmann, U., Perera, L., Berkowitz, M.L., Darden, T., Lee, H. and Pedersen, L.G. (1995) A Smooth Particle Mesh Ewald Method. *J Chem Phys*, **103**, 8577-8593.
6. Ryckaert, J.P., Ciccotti, G. and Berendsen, H.J.C. (1977) Numerical-Integration of Cartesian Equations of Motion of a System with Constraints - Molecular-Dynamics of N-Alkanes. *J. Comput. Phys.*, **23**, 327-341.
7. Harvey, S.C., Tan, R.K.Z. and Cheatham, T.E. (1998) The flying ice cube: Velocity rescaling in molecular dynamics leads to violation of energy equipartition. *J. Comput. Chem.*, **19**, 726-740.
